# Supplementary material for: Ultra-thin order–disorder CeO 2 nanobelts as the non-carbon support of the PtCu catalyst towards methanol oxidation and oxygen reduction reactions
Source: Royal Society of Chemistry journal article supplement (doi:10.1039/d4su00449c), 2024-01-01
Supplement: d4su00449c1.pdf [file d4su00449c1.pdf]

## Supporting information

### **The ultra-thin order-disordered CeO<sub>2</sub> nanobelts as the non-carbon support of PtCu catalyst towards methanol oxidation and oxygen reduction reactions**

Han Zhi<sup>a</sup>, Boda Dong<sup>a</sup>, Xingxing Guo<sup>b</sup>, Feng Xu<sup>ab1</sup>

<sup>a</sup> School of Advanced Manufacturing, Fuzhou University

<sup>b</sup> College of Materials Science and Engineering, Fuzhou University

---

<sup>1</sup> Corresponding author at: College of Materials Science and Engineering, Fuzhou University, Fuzhou, China.

Email address: [xufeng@fzu.edu.cn](mailto:xufeng@fzu.edu.cn).

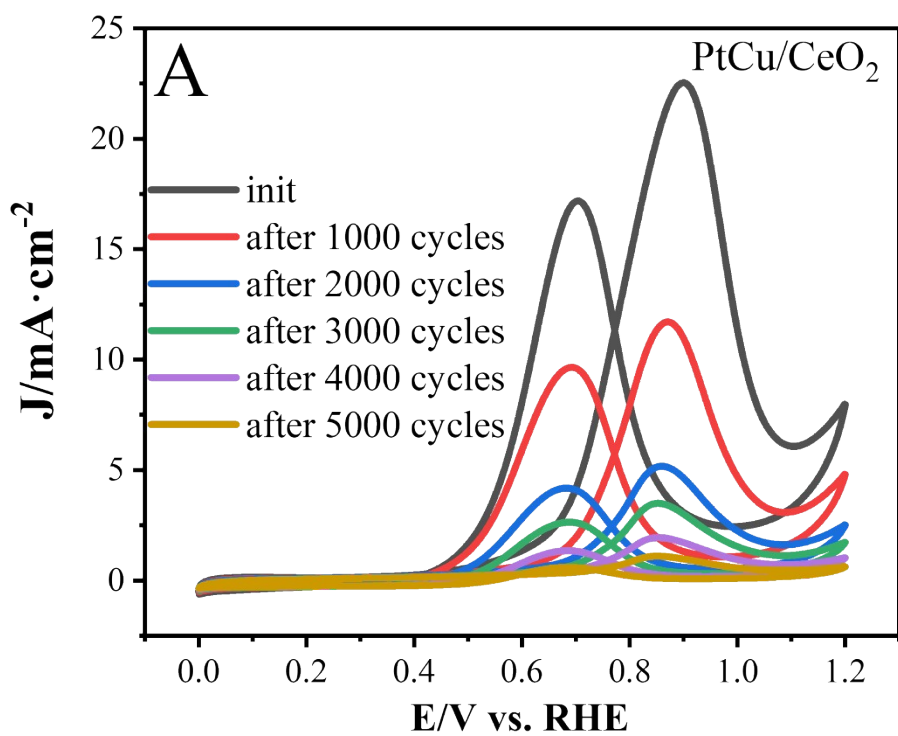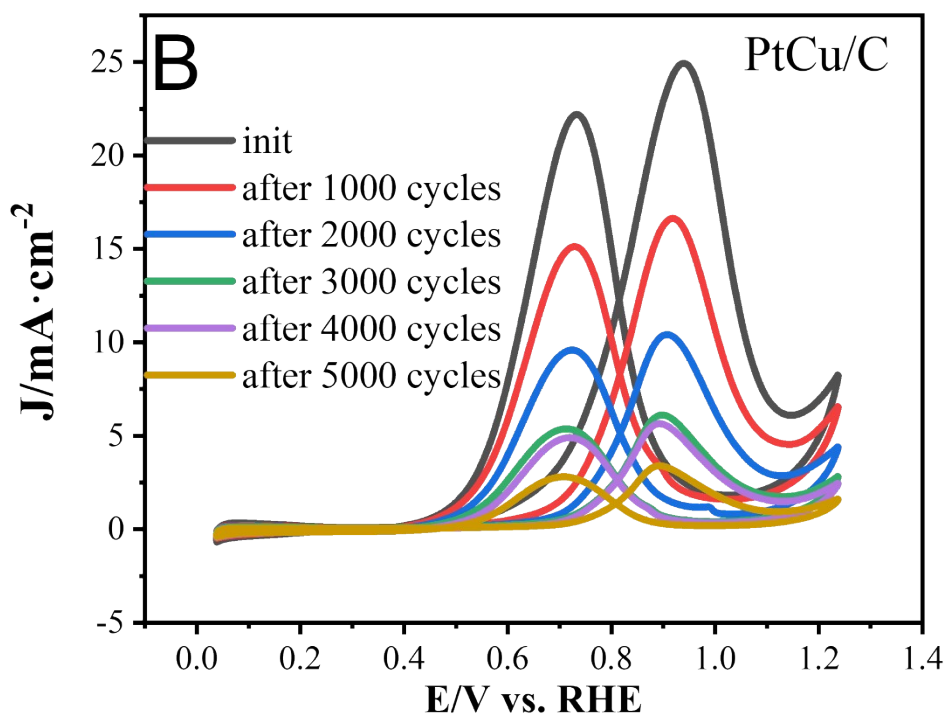

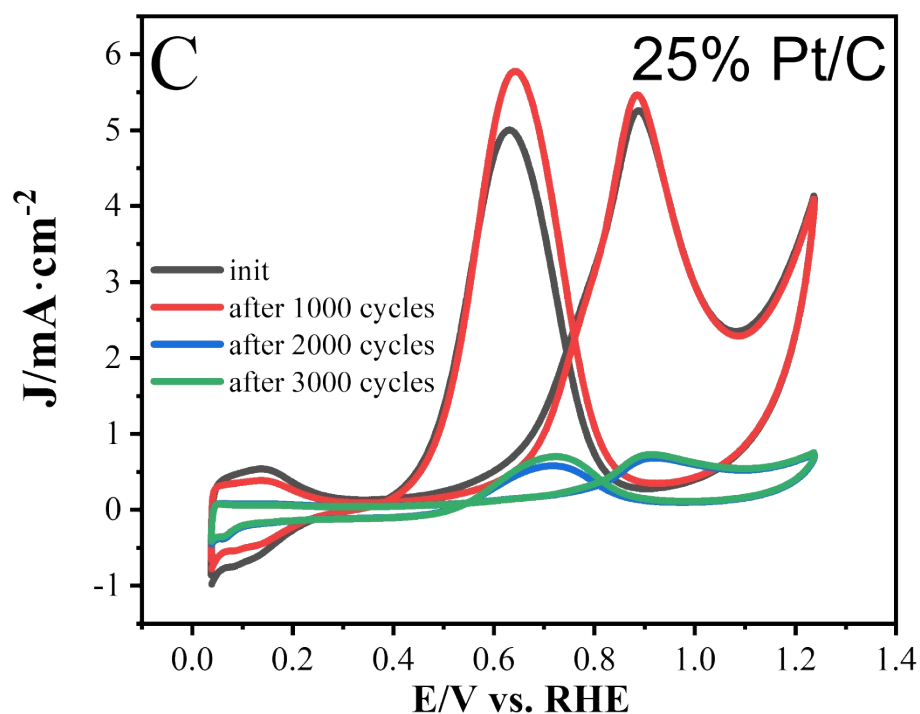

Figure S1 The ADT cycling of PtCu/CeO<sub>2</sub> (A), PtCu/C (B), and Pt/C (C).

The durability is also an important issue. Figure S1 shows the MOR curves of Pt/C, PtCu/C, and PtCu/CeO<sub>2</sub> after 5000 cycles and their MA losses. The forward scan current of Pt/C after 1000 cycles was already lower than the negative scanning current value, which indicated that the Faraday efficiency of Pt/C decreases dramatically after 1000 cycles. While the forward scan current of PtCu/C and PtCu/CeO<sub>2</sub> are always higher than negative one, illustrating the high Faraday efficiency. The degradation of catalytic activity was directly observed by the MA loss. The activity of Pt/C catalyst decreases sharply after 2000 ADT cycles. The MA of Pt<sub>0.15</sub>Cu/CeO<sub>2</sub> and PtCu/C after 5000 cycles retain 17.04% and 14.21%, respectively, due to the better durability of the PtCu alloy, the CeO<sub>2</sub> in the former gives a slight improvement in durability.

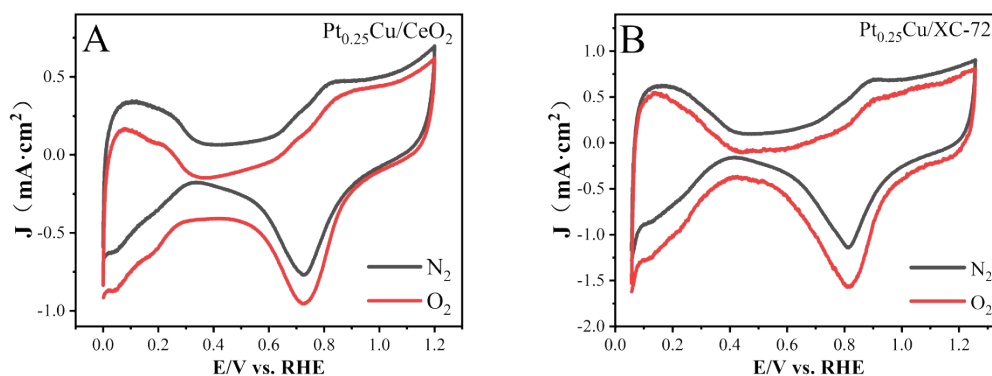

Figure S2 CV curves of Pt<sub>0.25</sub>Cu/CeO<sub>2</sub>, Pt<sub>0.15</sub>Cu/CeO<sub>2</sub>, and Pt<sub>0.25</sub>Cu/XC-72 under N<sub>2</sub> and O<sub>2</sub> saturated solutions, respectively

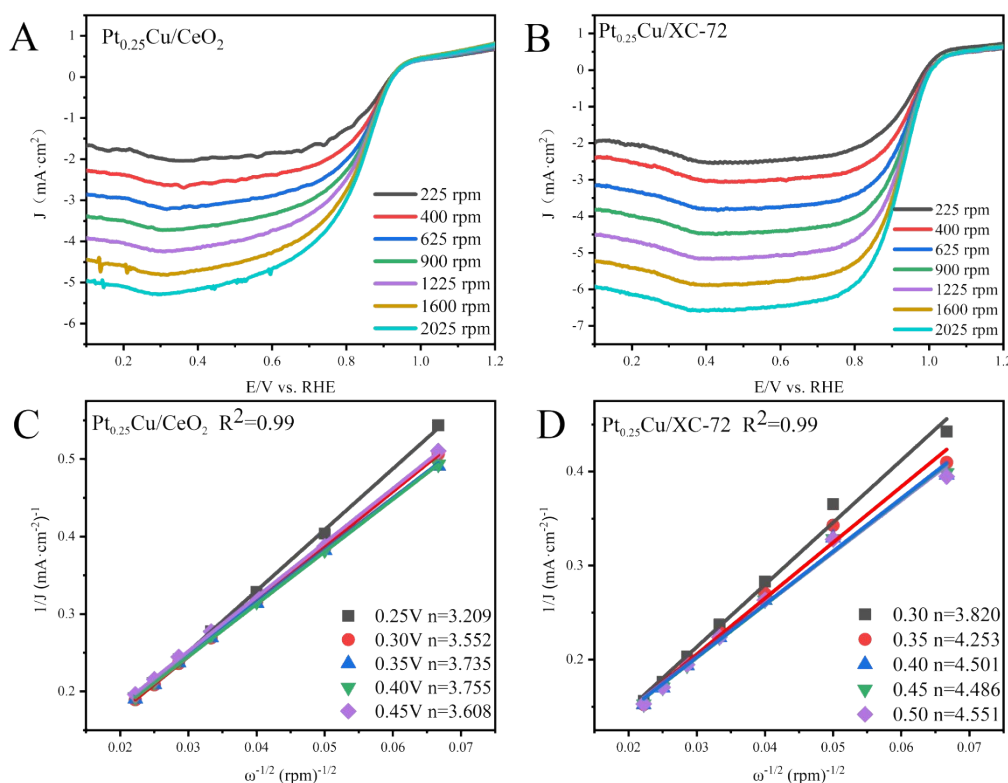

Figure S3 LSV curve and number of transferred electrons for each sample at different speeds

Firstly, LSV curves of the samples were tested at 225, 400, 625, 900, 1225, 1600, and 2025 rpm, then take the limit current density values of potential 0.25V, 0.3V, 0.35V, 0.4V, and 0.45V (vs.RHE) in the limit diffusion area to draw the scatter plot, The number of transferred electrons reflected by ORR is calculated by the slope of the fitted curve. Fig S3 shows the results.

Table S1 Peak positions of PtCu in each catalyst, Pt and Cu standard elements

| Sample                                 | (111) | (200) | (220) | (311) |
|----------------------------------------|-------|-------|-------|-------|
| Pt <sub>0.25</sub> Cu/CeO <sub>2</sub> | 39.81 | 46.29 | 67.52 | 81.34 |
| Pt                                     | 39.54 | 45.99 | 67.06 | 80.75 |
| Cu                                     | 43.32 | 50.45 | 74.12 | 89.94 |

Table S2 the value of Binding Energy of peak in XPS spectra for Pt, Cu and the proportion of zero-valence Pt atoms

| Sample                                 | Pt (eV)                           |                                   |                                    |                                    |                     | Cu (eV)                           |                                   |
|----------------------------------------|-----------------------------------|-----------------------------------|------------------------------------|------------------------------------|---------------------|-----------------------------------|-----------------------------------|
|                                        | Pt <sup>0</sup> 4f <sub>7/2</sub> | Pt <sup>0</sup> 4f <sub>5/2</sub> | Pt <sup>2+</sup> 4f <sub>7/2</sub> | Pt <sup>2+</sup> 4f <sub>5/2</sub> | Pt <sup>0</sup> (%) | Cu <sup>0</sup> 2p <sub>3/2</sub> | Cu <sup>0</sup> 2p <sub>1/2</sub> |
| Pt <sub>0.25</sub> Cu/CeO <sub>2</sub> | 70.97                             | 74.24                             | 72.59                              | 76.45                              | 89.34               | 931.14                            | 950.56                            |
| Pt <sub>0.25</sub> Cu/XC-72            | 71.52                             | 74.83                             | 72.25                              | 75.68                              | 32.83               | 932.26                            | 952.13                            |

Table S3 ICP-AES results of samples

| Sample                                 | Pt (wt.%) | Cu (wt.%) | CeO <sub>2</sub> (wt.%) | Pt (at.%) | Cu (at.%) | CeO <sub>2</sub> (at.%) |
|----------------------------------------|-----------|-----------|-------------------------|-----------|-----------|-------------------------|
| Pt <sub>0.25</sub> Cu/CeO <sub>2</sub> | 75.74     | 19.37     | 4.89                    | 53.98     | 42.07     | 3.95                    |
| Pt <sub>0.25</sub> Cu/XC-72            | 82.49     | 17.51     | 0                       | 60.72     | 39.28     | 0                       |

Table S4 Various performance values of the sample MOR test

| Sample                                 | $I_f$<br>(mA·cm <sup>-2</sup> ) | $I_b$<br>(mA·cm <sup>-2</sup> ) | $I_f/I_b$<br>(mA·cm <sup>-2</sup> ) | ECSA<br>(m <sup>2</sup> ·gPt <sup>-1</sup> ) | MA<br>(m <sup>2</sup> ·gPt <sup>-1</sup> ) | SA<br>(mA·cm <sup>-2</sup> ) |
|----------------------------------------|---------------------------------|---------------------------------|-------------------------------------|----------------------------------------------|--------------------------------------------|------------------------------|
| Pt <sub>0.25</sub> Cu/CeO <sub>2</sub> | 37.24                           | 30.01                           | 1.24                                | 8.91                                         | 0.32                                       | 0.36                         |
| 25% Pt/C                               | 5.23                            | 5.00                            | 1.05                                | 8.36                                         | 0.03                                       | 0.04                         |
| Pt <sub>0.25</sub> Cu/XC-72            | 24.93                           | 22.19                           | 1.12                                | 11.39                                        | 0.2                                        | 0.18                         |

Table S5 Various performance data of catalyst ORR test

| Sample                                 | $E_{onset}$<br>(V) | $E_{1/2}$<br>(V) | J<br>(mA·cm <sup>-2</sup> ) | Tafel slope<br>(mV·dec <sup>-1</sup> ) | ECSA<br>(m <sup>2</sup> ·gPt <sup>-1</sup> ) | MA<br>(m <sup>2</sup> ·gPt <sup>-1</sup> ) |
|----------------------------------------|--------------------|------------------|-----------------------------|----------------------------------------|----------------------------------------------|--------------------------------------------|
| Pt <sub>0.25</sub> Cu/CeO <sub>2</sub> | 0.92               | 0.82             | 4.82                        | 242.90                                 | 5.19                                         | 0.21                                       |
| Pt <sub>0.25</sub> Cu/XC-72            | 0.94               | 0.86             | 5.88                        | 268.20                                 | 8.58                                         | 0.24                                       |

Table S6 ORR performance values after endurance test

| Sample                                 | 5000 cycles     |               |                         | 10000 cycles    |               |                         |
|----------------------------------------|-----------------|---------------|-------------------------|-----------------|---------------|-------------------------|
|                                        | $E_{onset}$ (V) | $E_{1/2}$ (V) | J(mA·cm <sup>-2</sup> ) | $E_{onset}$ (V) | $E_{1/2}$ (V) | J(mA·cm <sup>-2</sup> ) |
| Pt <sub>0.25</sub> Cu/CeO <sub>2</sub> | 0.93            | 0.83          | 4.51                    | 0.90            | 0.72          | 4.30                    |
| Pt <sub>0.25</sub> Cu/XC-72            | 0.94            | 0.86          | 5.84                    | 0.94            | 0.85          | 5.63                    |
